# Supplementary material for: Pharmacodynamic monitoring of factor VIII replacement therapy in hemophilia A: Combining thrombin and plasmin generation
Source: PubMed Central journal article supplement — J Thromb Haemost. 2020 Oct 21;18(12):3222–31. doi: 10.1111/jth.15106 (PMC7756259; doi:10.1111/jth.15106), 2020-10-21
Supplement: JTH-18-3222-s001.pdf [file JTH-18-3222-s001.pdf]

**SUPPLEMENTARY APPENDIX**

**SUPPLEMENTARY FIGURES..... 2**

**Supplementary figure 1..... 2**

**Supplementary figure 2..... 3**

**Supplementary figure 3..... 4**

**Supplementary figure 4..... 5**

**Supplementary figure 5..... 6**

  

**SUPPLEMENTARY TABLES..... 7**

**Supplementary table 1..... 7**

**Supplementary table 2..... 9**

**Supplementary table 3..... 11**

SUPPLEMENTARY FIGURES

Supplementary figure 1

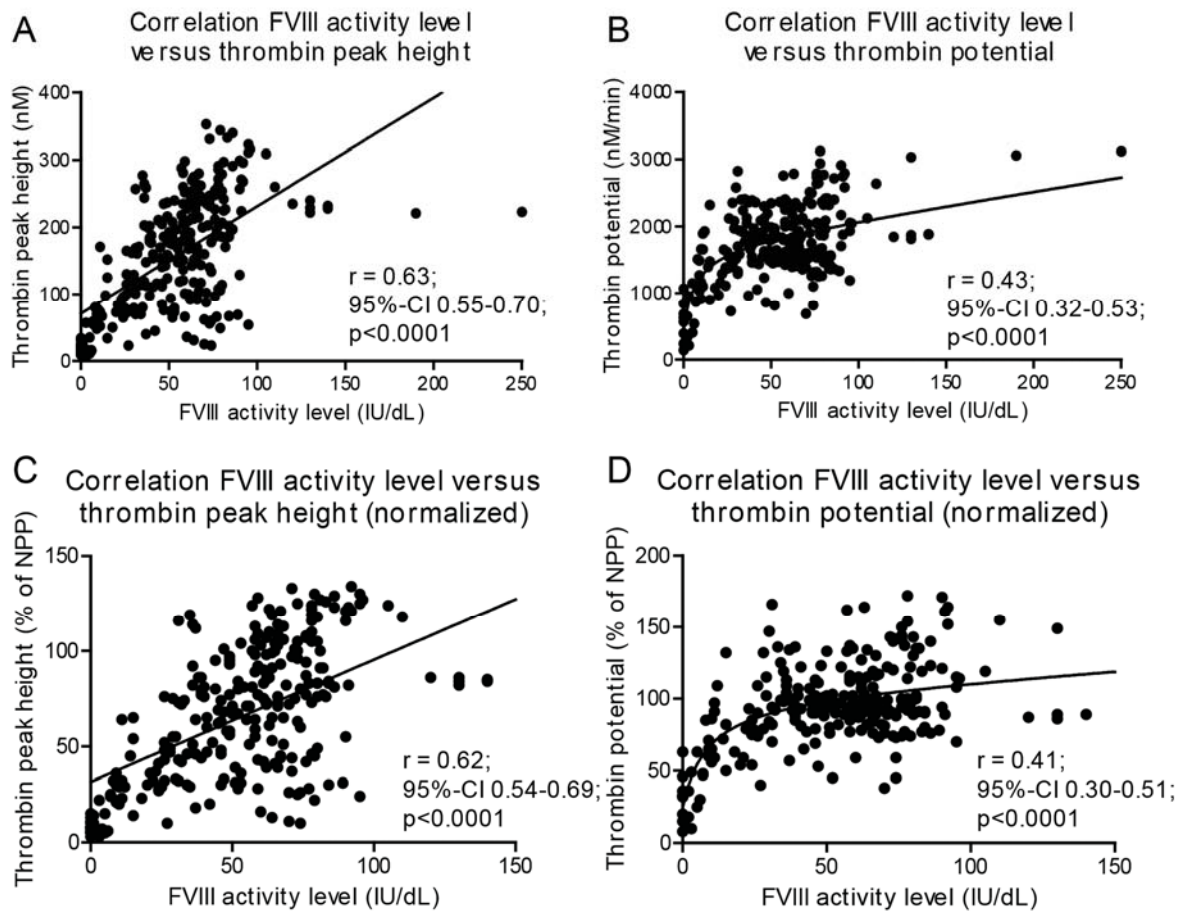

- A. Correlation between FVIII activity level (one stage) and thrombin peak height (absolute value),  $r=0.63$ ; 95%-CI 0.55-0.70;  $p<0.0001$ .
- B. Correlation between FVIII activity level (one stage) and thrombin potential (absolute value),  $r=0.43$ ; 95%-CI 0.32-0.53;  $p<0.0001$ .
- C. Correlation between FVIII activity level (one stage) and thrombin peak height (as percentage of normal pooled plasma),  $r=0.62$ ; 95%-CI 0.54-0.69;  $p<0.0001$ .
- D. Correlation between FVIII activity level (one stage) and thrombin potential (as percentage of normal pooled plasma),  $r=0.41$ ; 95%-CI 0.30-0.51;  $p<0.0001$ .

Supplementary figure 2

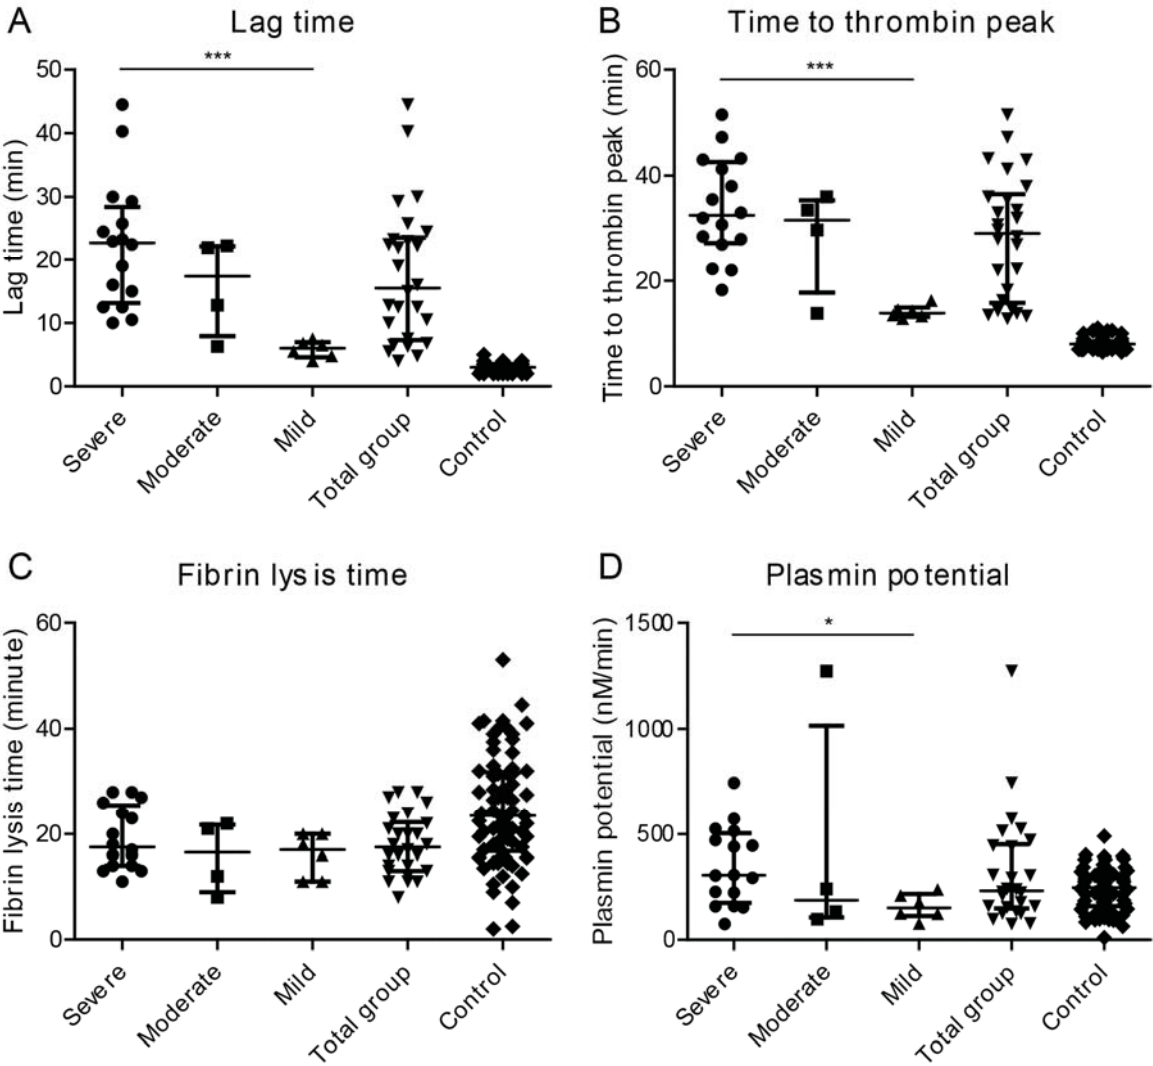

Baseline (pre-bolus) NHA parameters. Parameters given are lag time (A), time to thrombin peak (B), fibrin lysis time (C) and plasmin potential (D). Group data consist of all patients and the control represents all normal pooled plasma samples that ran as control with the NHA (n=73). Lines represent median with interquartile range in all graphs. \*  $p < 0.05$ ; \*\*  $p < 0.01$ ; \*\*\*  $p < 0.001$ .

Supplementary figure 3

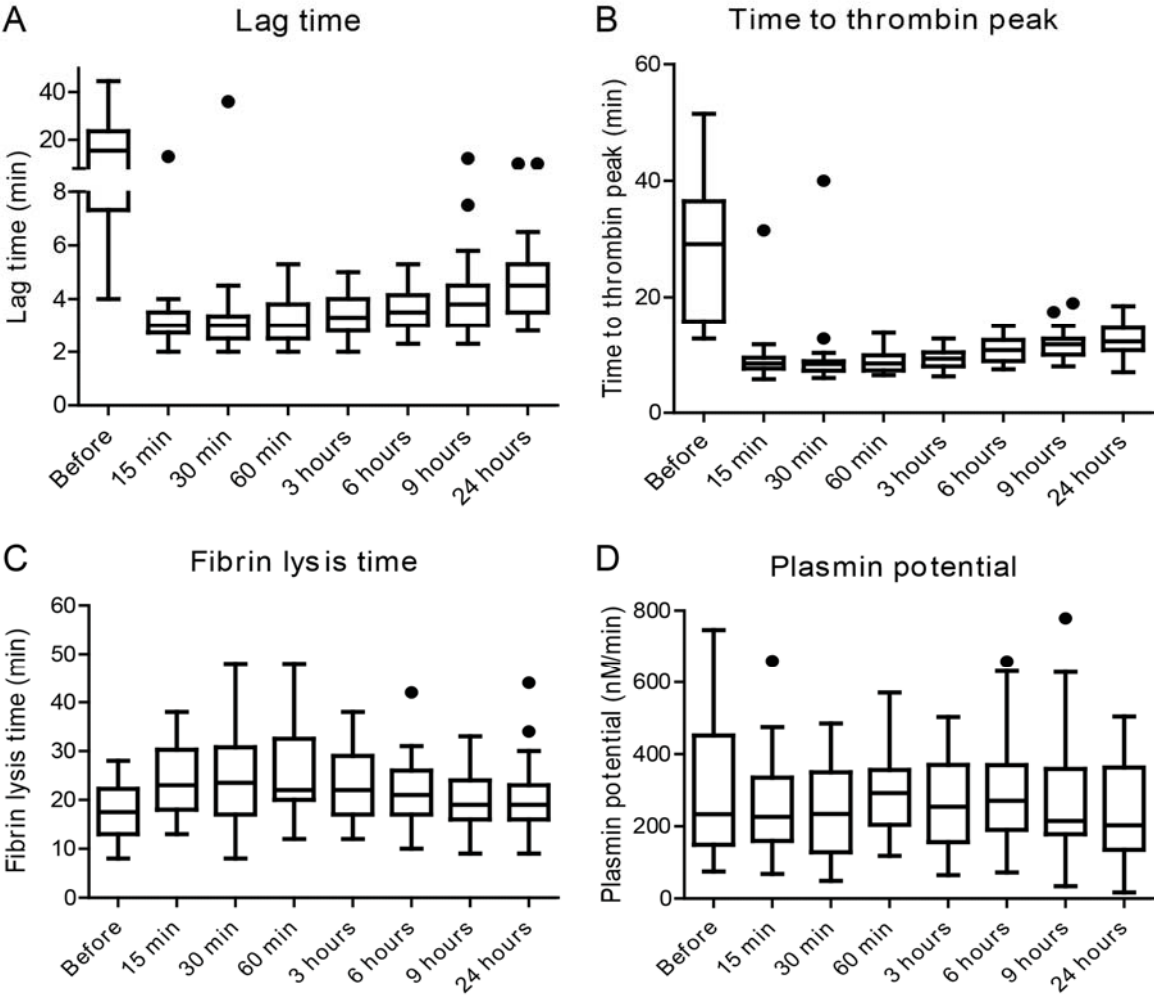

Characteristics of the NHA after a bolus of factor VIII replacement therapy. Lag time (A) and time to thrombin peak height (B). Fibrin lysis time (C) and plasmin potential (D). All values are given before and at set time points after the bolus of replacement therapy and are shown as Tukey box-and-whiskers in which box represents median with interquartile range, whiskers indicate minimum and maximum, dots represent outliers.

Supplementary figure 4

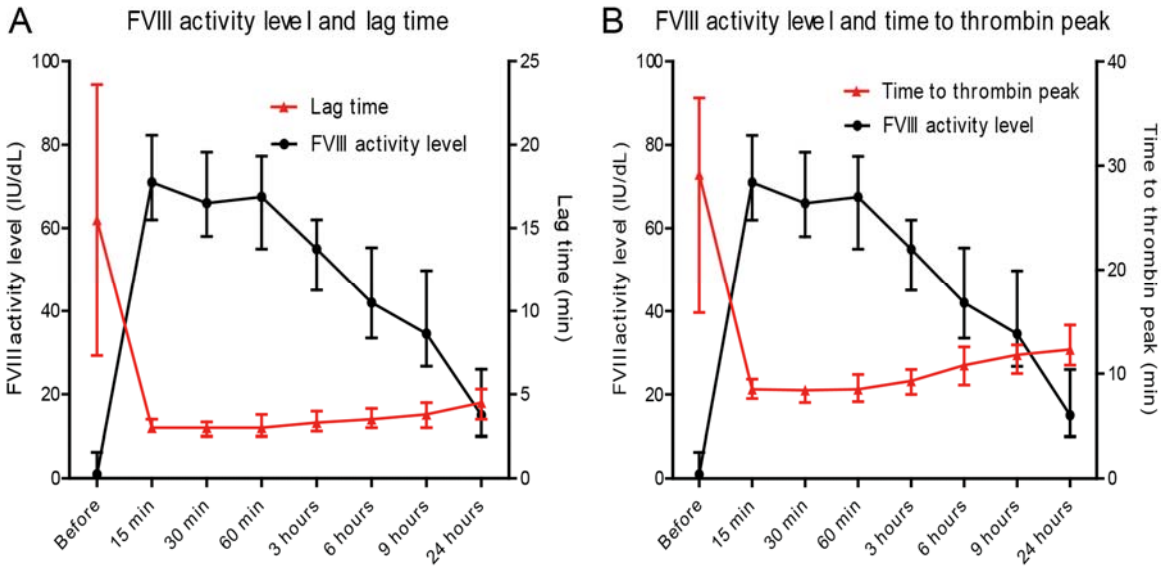

Reached FVIII activity level (in IU/dL on left y-axis; black) before and post infusion of FVIII replacement and lag time (4A; in min) and time to thrombin peak (4B, in min), both in red on right axis. Dots represent median and error indicates interquartile range.

Supplementary figure 5

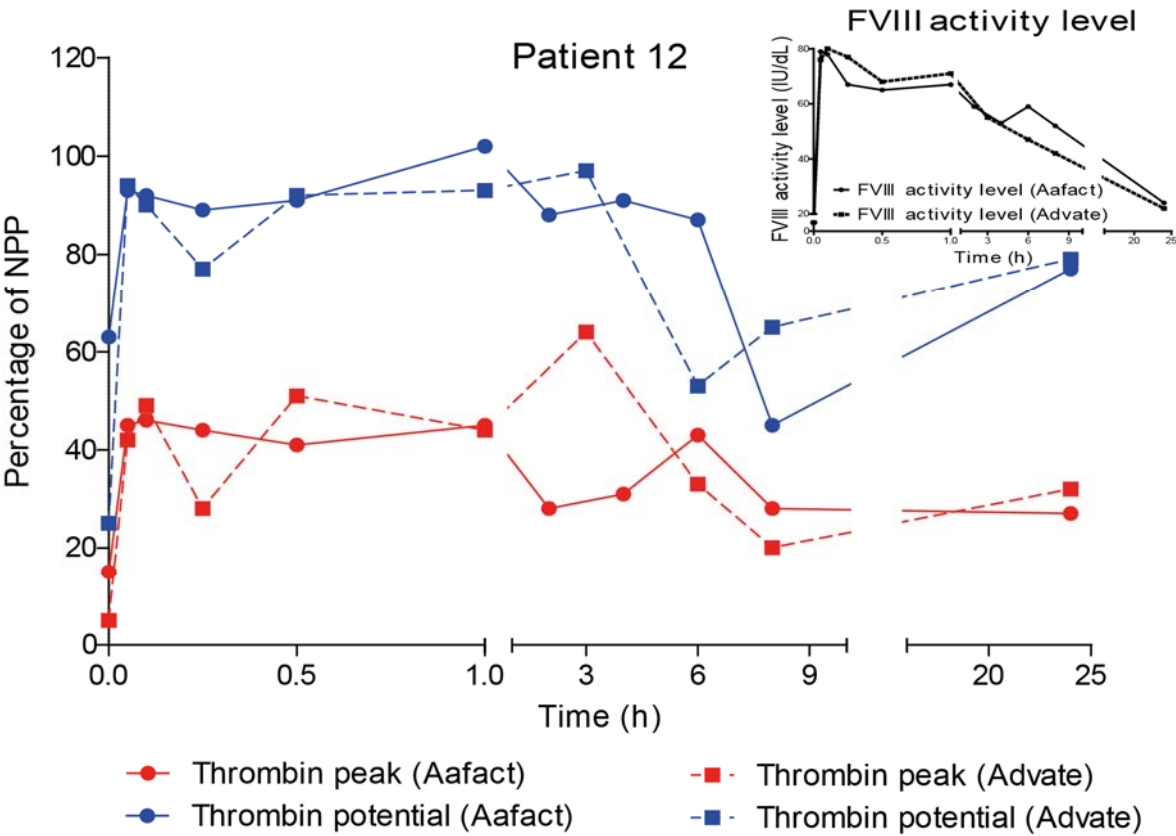

The pharmacokinetic and pharmacodynamic study was performed twice in one patient. The FVIII activity level (in black, insert) before and at different time points post infusion of a bolus of FVIII replacement therapy (23 IU/kg Aafact (round symbol and continuous line) and 26 IU/kg Advate (square symbol and dotted line), and thrombin peak height (red) and thrombin potential (blue), both as percentage of NPP.

FVIII: factor VIII; NPP: normal pooled plasma.

SUPPLEMENTARY TABLES

Table 1: Clinical characteristics of individual patients.

| Patient                  | Age (years) | Weight (kg) | FVIII one-stage pre bolus (IU/dL) | FVIII chromogenic pre bolus (IU/dL) | Factor VIII product | Total dosage of replacement therapy (IU) | Bolus of replacement therapy (IU/kg) | NBA concentration (NBU/mL) | NLTIA concentration (NLTIU/mL) |
|--------------------------|-------------|-------------|-----------------------------------|-------------------------------------|---------------------|------------------------------------------|--------------------------------------|----------------------------|--------------------------------|
| <b>Severe hemophilia</b> |             |             |                                   |                                     |                     |                                          |                                      |                            |                                |
| 1                        | 51          | 87          | < 1                               | -                                   | Advate              | 2160                                     | 25                                   | 0                          | -                              |
| 3                        | 33          | 66          | 2                                 | 2                                   | Advate              | 2160                                     | 33                                   | 0                          | -                              |
| 7                        | 43          | 92          | < 1                               | 1                                   | Advate              | 2500                                     | 27                                   | 0                          | 0                              |
| 8                        | 2           | 11          | 11*                               | 15*                                 | Kogenate            | 1000                                     | 91                                   | 0,3                        | 0,15                           |
| 10                       | 38          | 108         | < 1                               | < 1                                 | Advate              | 3000                                     | 28                                   | 0                          | 0                              |
| 11                       | 29          | 68          | < 1                               | < 1                                 | Aafact              | 1800                                     | 26                                   | 0                          | 0                              |
| 13                       | 6           | 19          | < 1                               | 4                                   | Advate              | 750                                      | 39                                   | 0                          | 0,1                            |
| 14                       | 7           | 24          | < 1                               | < 1                                 | Helixate            | 1000                                     | 42                                   | 0                          | 0                              |
| 15                       | 35          | 85          | 1                                 | < 1                                 | Advate              | 3000                                     | 35                                   | 0                          | 0,04                           |
| 16                       | 61          | 78          | 4                                 | 5                                   | Aafact              | 2000                                     | 26                                   | -                          | -                              |
| 17                       | 41          | 85          | < 1                               | 1                                   | Aafact              | 3000                                     | 35                                   | 0                          | 0                              |
| 22                       | 62          | 55          | < 1                               | 2                                   | Advate              | 1500                                     | 27                                   | 0                          | 0                              |
| 24                       | 60          | 89          | < 1                               | < 1                                 | Aafact              | 3000                                     | 34                                   | 0                          | 0                              |
| 27                       | 60          | 71          | < 1                               | 2                                   | Helixate            | 3500                                     | 49                                   | 0                          | 0                              |

|                            |    |     |     |    |           |      |    |     |      |
|----------------------------|----|-----|-----|----|-----------|------|----|-----|------|
| <b>29</b>                  | 20 | 134 | 1   | 3  | Haemate P | 4000 | 30 | 0   | 0    |
| <b>33</b>                  | 55 | 91  | < 1 | 4  | Advate    | 2500 | 27 | 0   | 0    |
| <b>Moderate hemophilia</b> |    |     |     |    |           |      |    |     |      |
| <b>12-1</b>                | 50 | 72  | 5   | -  | Aafact    | 1700 | 23 | -   | -    |
| <b>12-2</b>                | 56 | 77  | 5   | 1  | Advate    | 2000 | 26 | 0   | 0    |
| <b>19</b>                  | 70 | 85  | 6   | 8  | Helixate  | 2500 | 29 | 0   | 0    |
| <b>20</b>                  | 65 | 60  | 6   | 9  | Helixate  | 3000 | 50 | 0   | 0    |
| <b>Mild hemophilia</b>     |    |     |     |    |           |      |    |     |      |
| <b>9</b>                   | 77 | 70  | 11  | 12 | Refacto   | 2000 | 29 | 0   | 0    |
| <b>18</b>                  | 42 | 105 | 21  | 10 | Helixate  | 2500 | 24 | 0   | 0    |
| <b>21</b>                  | 68 | 88  | 7   | 6  | Kogenate  | 3000 | 34 | 0   | 0    |
| <b>30</b>                  | 50 | 94  | 9   | 6  | Advate    | 2500 | 27 | 0,3 | 0,07 |
| <b>31</b>                  | 52 | 73  | 7   | 5  | Kogenate  | 2000 | 27 | 0   | 0    |
| <b>32</b>                  | 51 | 90  | 9   | 9  | Advate    | 2500 | 28 | 0   | 0    |

\* Residual FVIII due to administration of FVIII concentrate every 24 hours because of bleeding symptoms otherwise.

- Not applicable.



Supplementary table 2: Pre- and post-infusion values of FVIII activity level and Nijmegen Hemostasis Assay parameters as absolute values for all parameters and as percentage of normal pooled plasma (NPP) for thrombin peak height and thrombin potential. The median and interquartile range (IQR) are given for each timepoint.

|                                     | Time   | Reference* | Before           | 15 min    | 30 min    | 60 min    | 3 hours   | 6 hours   | 9 hours   | 24 hours  |
|-------------------------------------|--------|------------|------------------|-----------|-----------|-----------|-----------|-----------|-----------|-----------|
| <b>FVIII activity level (IU/dL)</b> | Median | 60-150#    | 1                | 71        | 66        | 68        | 55        | 42        | 35        | 15        |
|                                     | IQR    |            | <1-6             | 62-82     | 58-78     | 55-77     | 45-62     | 34-55     | 27-50     | 10-26     |
| <b>Lag time (min)</b>               | Median | 3.0        | 16.0             | 3.0       | 3.0       | 3.0       | 3.3       | 3.5       | 3.8       | 4.5       |
|                                     | IQR    | 2.5-3.5    | 7.3-23.6         | 2.8-3.5   | 2.5-3.4   | 2.5-3.8   | 2.8-4.0   | 3.0-4.2   | 3.0-4.5   | 3.5-5.3   |
| <b>Time to thrombin peak (min)</b>  | Median | 8.0        | 29.2             | 8.5       | 8.4       | 8.5       | 9.3       | 10.8      | 11.8      | 12.3      |
|                                     | IQR    | 7.5-8.5    | 15.9-36.5        | 7.6-9.5   | 7.2-8.9   | 7.3-9.9   | 8.0-10.4  | 8.9-12.6  | 10.0-12.8 | 10.8-14.7 |
| <b>Thrombin peak height (nM)</b>    | Median | 239        | 23               | 219       | 208       | 196       | 174       | 116       | 112       | 73        |
|                                     | IQR    | 25.8       | 15-39            | 149-253   | 166-241   | 142-236   | 151-215   | 101-191   | 79-168    | 56-120    |
| <b>Thrombin potential (nM/min)</b>  | Median | 1846       | 471              | 1823      | 1808      | 1846      | 1839      | 1752      | 1640      | 1392      |
|                                     | IQR    | 160        | undetectable-924 | 1538-2168 | 1542-2126 | 1527-2148 | 1549-2113 | 1495-2146 | 1418-2100 | 1054-1660 |
| <b>Plasmin peak (nM)</b>            | Median | 27.7       | 38               | 29        | 28        | 31        | 32        | 34        | 30        | 26        |

|                                        |        |           |                 |         |         |         |         |         |         |         |
|----------------------------------------|--------|-----------|-----------------|---------|---------|---------|---------|---------|---------|---------|
|                                        | IQR    | 8.8       | 24-53           | 23-42   | 17-38   | 25-41   | 22-41   | 22-44   | 23-42   | 18-41   |
| <b>Fibrin lysis time (min)</b>         | Median | 23.5      | 18              | 23      | 24      | 22      | 22      | 21      | 19      | 19      |
|                                        | IQR    | 16.8-31.8 | 13-22           | 18-30   | 17-31   | 20-33   | 17-29   | 17-26   | 16-24   | 16-23   |
| <b>Plasmin potential (nM/min)</b>      | Median | 235       | 234             | 227     | 234     | 292     | 254     | 271     | 215     | 203     |
|                                        | IQR    | 101       | 149-452         | 160-335 | 129-350 | 204-356 | 156-371 | 191-370 | 179-359 | 135-363 |
| <b>Thrombin peak height (% of NPP)</b> | Median | §         | 10              | 87      | 85      | 80      | 73      | 51      | 46      | 32      |
|                                        | IQR    |           | 6-17            | 57-108  | 70-105  | 64-96   | 63-87   | 43-78   | 31-75   | 23-50   |
| <b>Thrombin potential (% of NPP)</b>   | Median | §         | 28              | 97      | 94      | 99      | 96      | 92      | 90      | 74      |
|                                        | IQR    |           | undetectable-51 | 86-121  | 89-119  | 90-118  | 89-113  | 82-113  | 79-114  | 59-87   |

\* Reference results of the Nijmegen Hemostasis Assay based on normal pooled plasma used as positive control during every run with patient samples (in total 73 runs of one batch of NNP were analyzed).

# Reference values of FVIII activity level of the one-stage assay.

§ As this is the percentage of normal pooled plasma (NPP), the reference value is always 100%.

Supplementary table 3: Individual baseline values of FVIII activity level and Nijmegen Hemostasis Assay parameters.

| <b>Number</b>            | <b>Baseline FVIII activity level (IU/dL; one-stage)</b> | <b>Baseline FVIII activity level (IU/dL; chromogenic)</b> | <b>Lag Time (minutes)</b> | <b>Time To Thrombin Peak (minutes)</b> | <b>Thrombin Peak Height (nM)</b> | <b>Thrombin Potential (nM/min)</b> | <b>Fibrin Lysis Time (min)</b> | <b>Plasmin Peak Height (nM)</b> | <b>Plasmin Potential (nM/min)</b> |
|--------------------------|---------------------------------------------------------|-----------------------------------------------------------|---------------------------|----------------------------------------|----------------------------------|------------------------------------|--------------------------------|---------------------------------|-----------------------------------|
| <b>Severe hemophilia</b> |                                                         |                                                           |                           |                                        |                                  |                                    |                                |                                 |                                   |
| <b>1</b>                 | < 1                                                     | -                                                         | 30,0                      | 41,3                                   | 24                               | 256                                | 23                             | 28                              | 573                               |
| <b>3</b>                 | 2                                                       | 2                                                         | 25,8                      | 35,5                                   | 11                               | 332                                | 26                             | 28                              | 440                               |
| <b>7</b>                 | < 1                                                     | 1                                                         | 23,3                      | 38,0                                   | 11                               | 237                                | 28                             | 46                              | 746                               |
| <b>8</b>                 | 11                                                      | 15                                                        | 40,3                      | 51,5                                   | 9                                | undetectable                       | 28                             | 8                               | 75                                |
| <b>10</b>                | < 1                                                     | < 1                                                       | 44,5                      | 47,3                                   | 18                               | 143                                | 14                             | 49                              | 294                               |
| <b>11</b>                | < 1                                                     | < 1                                                       | 10,0                      | 28,5                                   | 13                               | undetectable                       | 20                             | 55                              | 445                               |
| <b>13</b>                | < 1                                                     | 4                                                         | 23,0                      | 43,3                                   | 12                               | undetectable                       | 24                             | 54                              | 472                               |
| <b>14</b>                | < 1                                                     | < 1                                                       | 22,5                      | 43,0                                   | 25                               | undetectable                       | 16                             | 42                              | 228                               |
| <b>15</b>                | 1                                                       | < 1                                                       | 19,0                      | 28,0                                   | 26                               | undetectable                       | 13                             | 52                              | 154                               |
| <b>16</b>                | 4                                                       | 5                                                         | 29,3                      | 32,0                                   | 16                               | undetectable                       | 27                             | 45                              | 308                               |
| <b>17</b>                | < 1                                                     | 1                                                         | 10,5                      | 18,3                                   | 22                               | 569                                | 13                             | 40                              | 224                               |
| <b>22</b>                | < 1                                                     | 2                                                         | 12,5                      | 33,0                                   | 16                               | 628                                | 16                             | 56                              | 515                               |
| <b>24</b>                | < 1                                                     | < 1                                                       | 24,5                      | 30,8                                   | 34                               | 1069                               | 11                             | 80                              | 305                               |
| <b>27</b>                | < 1                                                     | 2                                                         | 15,0                      | 22,0                                   | 22                               | 684                                | 17                             | 23                              | 160                               |
| <b>29</b>                | 1                                                       | 3                                                         | 16,0                      | 27,0                                   | 32                               | undetectable                       | 18                             | 27                              | 159                               |

|                            |     |    |      |      |    |              |    |    |      |
|----------------------------|-----|----|------|------|----|--------------|----|----|------|
| <b>33</b>                  | < 1 | 4  | 12,5 | 22,3 | 31 | 841          | 14 | 63 | 525  |
| <b>Moderate hemophilia</b> |     |    |      |      |    |              |    |    |      |
| <b>12</b>                  | 5   | -  | 6,3  | 13,8 | 35 | 1149         | 8  | 21 | 98   |
| <b>12</b>                  | 5   | 1  | 22,0 | 29,8 | 11 | 404          | 12 | 25 | 134  |
| <b>19</b>                  | 6   | 8  | 12,8 | 36,0 | 15 | undetectable | 22 | 38 | 242  |
| <b>20</b>                  | 6   | 9  | 22,3 | 33,5 | 16 | 537          | 21 | 80 | 1273 |
| <b>Mild hemophilia</b>     |     |    |      |      |    |              |    |    |      |
| <b>9</b>                   | 11  | 12 | 4,8  | 13,5 | 52 | 1103         | 20 | 34 | 211  |
| <b>18</b>                  | 21  | 10 | 6,8  | 12,8 | 84 | 1159         | 18 | 15 | 124  |
| <b>21</b>                  | 7   | 6  | 6,5  | 14,5 | 59 | 867          | 11 | 24 | 125  |
| <b>30</b>                  | 9   | 6  | 4,0  | 13,3 | 70 | 1110         | 20 | 38 | 239  |
| <b>31</b>                  | 7   | 5  | 5,5  | 16,3 | 55 | 876          | 16 | 20 | 178  |
| <b>32</b>                  | 9   | 9  | 7,5  | 14,3 | 79 | 1269         | 11 | 23 | 78   |
